1 **Title: Temperature response of Rubisco kinetics in *Arabidopsis thaliana*: thermal**  
2 **breakpoints and implications for reaction mechanisms.**

3

4 Running title: **Rubisco kinetic thermal breakpoints and reaction mechanisms**

5

6 **Authors:** Ryan A. Boyd<sup>1,3</sup>, Amanda P. Cavanagh<sup>2,3</sup>, David S. Kubien<sup>2</sup>, Asaph B. Cousins<sup>1\*</sup>

7

8 <sup>1</sup>School of Biological Sciences, Molecular Plant Sciences, Washington State University, PO Box  
9 644236, Pullman, WA 99164-4236, USA

10

11 <sup>2</sup>Department of Biology, University of New Brunswick, PO Box 4400, Fredericton, NB, E3B  
12 5A3, Canada.

13

14 <sup>3</sup>Present address: Carl R. Woese Institute for Genomic Biology, University of Illinois at Urbana-  
15 Champaign, Urbana, IL 61801, USA

16

17 \*To whom correspondence should be addressed. Email: [acousins@wsu.edu](mailto:acousins@wsu.edu)

18

19

20 ABSTRACT

21 Optimization of Rubisco kinetics could improve photosynthetic efficiency, ultimately  
22 resulting in increased crop yield. However, imprecise knowledge of the reaction mechanism and  
23 the individual rate constants limit our ability to optimize the enzyme. Membrane inlet mass  
24 spectrometry (MIMS) may offer benefits over traditional methods for determining individual  
25 rate constants of the Rubisco reaction mechanism, as it can directly monitor concentration  
26 changes in CO<sub>2</sub>, O<sub>2</sub>, and their isotopologs during assays. However, a direct comparison of MIMS  
27 to the traditional Radiolabel method of determining Rubisco kinetic parameters has not been  
28 made. Here, the temperature responses of Rubisco kinetic parameters from *Arabidopsis thaliana*  
29 were measured using the Radiolabel and MIMS methods. The two methods provided comparable  
30 parameters above 25 °C, but temperature responses deviated at low temperature as MIMS  
31 derived catalytic rates of carboxylation, oxygenation, and CO<sub>2</sub>/O<sub>2</sub> specificity showed thermal  
32 breakpoints. Here we discuss the variability and uncertainty surrounding breakpoints in the  
33 Rubisco temperature response and relevance of individual rate constants of the reaction  
34 mechanisms to potential breakpoints.

35

36 Keywords: Rubisco, Temperature, Kinetic breakpoints, Membrane inlet mass spectrometry,

37 *Arabidopsis*, reaction mechanisms

38

## 39 INTRODUCTION

40           The enzyme Ribulose-1,5-bisphosphate carboxylase/oxygenase (Rubisco) catalyzes the  
41 reaction of CO<sub>2</sub> or O<sub>2</sub> with Ribulose-1,5-bisphosphate (RuBP) initiating the photosynthetic  
42 carbon reduction cycle or photorespiratory cycle, respectively (Bowes *et al.*, 1971; Andrews *et*  
43 *al.*, 1973). Kinetic studies on Rubisco typically report the Michaelis-Menten constants for  
44 carboxylation ( $K_C$ ) and oxygenation ( $K_O$ ), the catalytic rate of carboxylation ( $k_{\text{catCO}_2}$ ) and  
45 oxygenation ( $k_{\text{catO}_2}$ ), and the specificity of the enzyme for CO<sub>2</sub> over O<sub>2</sub> ( $S_{C/O}$ ) as these parameters  
46 are used for modeling leaf gas exchange (von Caemmerer, 2000). Each of the above Michaelis-  
47 Menten parameters is a combination of elementary rate constants that describe the reaction  
48 mechanism; however, the rate constants are less well studied (Tcherkez, 2013; Tcherkez, 2016).  
49 Optimization of Rubisco kinetics for enhanced CO<sub>2</sub> reduction has been proposed (Spreitzer and  
50 Salvucci, 2002), but this effort is limited by our current understanding of the reaction mechanism  
51 (Tcherkez *et al.*, 2006; Tcherkez, 2013).

52           The carboxylation and oxygenation reaction mechanisms can be separated into  
53 elementary rate constant as originally proposed by Farquhar (1979), reviewed by Tcherkez  
54 (2013) and reproduced in Figure 1. Since the initial description of the reaction mechanism  
55 (Hurwitz *et al.* 1956) there has been slow progress in defining rate constants due to experimental  
56 difficulties in isolating their individual effects. However, the use of membrane inlet mass  
57 spectrometry (MIMS) to study Rubisco kinetics may hold promise. The traditional Radiolabel  
58 method used in most Rubisco publications relies on <sup>14</sup>C assays to determine  $k_{\text{catCO}_2}$ ,  $K_C$ ,  $K_O$ , a  
59 separate <sup>3</sup>H assay to determine  $S_{C/O}$ , leaving  $k_{\text{catO}_2}$  to be calculated. Alternatively, the MIMS  
60 assay simultaneously measures changing concentrations of CO<sub>2</sub> and O<sub>2</sub> and can therefore  
61 determine all kinetic parameters with a single assay (Cousins *et al.*, 2010; Boyd *et al.*, 2015). An

62 advantage of the MIMS method is that in addition to the abundant isotopologues of CO<sub>2</sub> (<sup>12</sup>CO<sub>2</sub>)  
63 and O<sub>2</sub> (<sup>16</sup>O<sub>2</sub>) the system can monitor less abundant stable isotopologues such as <sup>13</sup>CO<sub>2</sub> and  
64 <sup>16</sup>O<sup>18</sup>O. Measurements of primary kinetic isotope effects have been useful in defining enzyme  
65 reaction mechanisms (O’Leary *et al.*, 1992); therefore, the MIMS system may provide new  
66 information regarding the individual rate constants. At 25 °C the MIMS method has been used  
67 for determining both Rubisco carbon fractionation (McNevin *et al.*, 2006; McNevin *et al.*, 2007;  
68 Tcherkez *et al.*, 2013), and Michaelis-Menten constants of the carboxylation ( $v_c$ ) and  
69 oxygenation ( $v_o$ ) reactions (Cousins *et al.*, 2010). Additionally, it was used to determine the  
70 temperature dependencies of the Rubisco kinetic parameters in the C<sub>4</sub> species *Setaria viridis*  
71 (Boyd *et al.*, 2015). However, previous work using the Radiolabel method suggest lower  $E_a$   
72 values for  $V_{cmax}$  in C<sub>4</sub> species than that measured by Boyd *et al.* (2015; Sharwood *et al.*, 2016;  
73 Sage, 2002; Kubien *et al.*, 2003; Perdomo *et al.*, 2015), suggesting comparisons between the  
74 MIMS  $E_a$  values and the traditional Radiolabel method are needed.

75         Here we measured the temperature response of Rubisco kinetic parameters from  
76 *Arabidopsis thaliana* using two methods. First, we used the traditional method involving the use  
77 of radiolabeled substrate and analysis of labeled products following the reaction in known  
78 concentrations of CO<sub>2</sub> and O<sub>2</sub> (Jordan and Ogren, 1981), which we referred to as the Radiolabel  
79 method. Secondly, we used the MIMS method following the simultaneous consumption of CO<sub>2</sub>  
80 and O<sub>2</sub> over time, giving a direct measure of  $v_c$ ,  $v_o$ , CO<sub>2</sub>, and O<sub>2</sub> leading to simultaneous  
81 determination of  $k_{catCO_2}$ ,  $k_{catO_2}$ ,  $K_C$ ,  $K_O$ , and  $S_{C/O}$  (Cousins *et al.*, 2010; Boyd *et al.*, 2015).  
82 Additionally, for the Radiolabel method we compared curve fitting CO<sub>2</sub> responses to determine  
83  $K_C$  and  $k_{catCO_2}$  simultaneously in an O<sub>2</sub> free buffer, and  $k_{catCO_2}$  determined at a single bicarbonate  
84 concentration at all temperatures in open air. The later is a common practice for determining

85  $k_{\text{catCO}_2}$  temperature responses (Tieszen and Sigurdson, 1973; Sage *et al.*, 1995; Crafts-Brander  
86 and Salvucci, 2000; Pittermann and Sage, 2000; Sage, 2002; Kubien *et al.*, 2003; Perdomo *et al.*,  
87 2015).

88         Recently, the existence of breakpoints in the  $k_{\text{catCO}_2}$  temperature response was highlighted  
89 as a source of variability in the Rubisco temperature response literature (Sharwood *et al.*, 2016).  
90 Initial observations of breakpoints in  $V_{\text{cmax}}$  temperature responses were determined to be a  
91 methodological artifact due to the use of a single bicarbonate concentration at all temperatures  
92 and were corrected by varying bicarbonate concentration with temperature (Björkman and  
93 Percy, 1970). However, breakpoints were later observed for  $k_{\text{catCO}_2}$ ,  $k_{\text{catO}_2}$ , and  $K_C$  at 15 °C using  
94 a curve fitting method (Badger and Collatz, 1977). It was suggested that these breakpoints could  
95 be due to changes in rate limiting steps of the reaction mechanism caused by changes in enzyme  
96 conformation (Badger and Collatz, 1977). An additional breakpoint was reported in the  $k_{\text{catCO}_2}$  of  
97 *Oryza sativa* at 22 °C (Sage, 2002) and Kubien *et al.* (2003) observed different temperature  
98 responses when  $k_{\text{catCO}_2}$  was measured from 0 to 12 °C compared to 18 to 42 °C in *Flaveria*  
99 *bidentis*. Most recently, Sharwood *et al.* (2016) observed breakpoints in  $k_{\text{catCO}_2}$  at 25 °C for  
100 Panicoid grasses when using a curve fitting method. Inconsistencies are evident between studies,  
101 and it is unclear if breakpoints are universal to all temperature response studies of plant Rubisco.  
102 Here, we discuss the possible causes of breakpoints, focusing on the three previously proposed  
103 causes of breakpoints: erroneous bicarbonate concentrations, changes in rate limiting step of the  
104 reaction mechanism, and deactivation of Rubisco at low temperature, using the Radiolabel and  
105 MIMS data sets reported here.

106

107

## 108 MATERIALS AND METHODS

109

### 110 **Plant Growth**

111 Plants for the Radiolabel method were grown and assayed at the University of New  
112 Brunswick, Fredericton, Canada. *Arabidopsis thaliana* (Col-0) seeds were stratified for 3 days at  
113 4 °C on Promix (Plant Products, Brampton, Canada), transferred to a growth chamber (E-15,  
114 Conviron, Winnipeg, Manitoba, Canada) and grown under photoperiod conditions of 10 h  
115 light/14 h dark, 20/18 °C, and a photosynthetic photon flux density (PPFD) of 300  $\mu\text{mol m}^{-2} \text{s}^{-1}$ .  
116 Plants were watered with modified Hoagland's solution as needed.

117 Plants for MIMS were grown and assayed at Washington State University, Pullman,  
118 Washington, U.S.A. Seeds of *A. thaliana*, ecotype Col-0, were placed in 2 L pots containing  
119 commercial soil (LC1 Sunshine Mix, Sun Gro Horticulture, Vancouver, Canada) and grown in  
120 an environmental growth chamber (Biochambers GC-16, Winnipeg, Manitoba, Canada) at a  
121 PPFD of 300  $\mu\text{mol m}^{-2} \text{s}^{-1}$  at plant height, relative humidity was not controlled, air/night  
122 temperature of 23/18 °C, with a 14 hour photoperiod and 10 hours of dark. Plants were fertilized  
123 weekly (Peters 20-20- 20, Allentown, PA, USA) and watered as needed.

124

### 125 **Sampling for Radiolabel Analysis**

126 Leaf punches were obtained at mid-day, flash frozen in liquid nitrogen and stored at -80  
127 °C until extraction. Leaf tissue was ground (1.1  $\text{cm}^2$  disks, ca. 20 mg) in a Tenbroeck glass tissue  
128 homogenizer containing 3 mL of ice-cold extraction buffer (100 mM HEPES pH 7.6, 2 mM Na-  
129 EDTA, 5 mM  $\text{MgCl}_2$ , 5 mM dithiothreitol [DTT], 10  $\text{mg ml}^{-1}$  polyvinyl polypyrrolidone, 2%  
130 (vol/vol) Tween-80, 2 mM  $\text{NaH}_2\text{PO}_4$ , 12 mM amino-*n*-capronic acid, and 2 mM benzamidine)

131 and 50  $\mu$ L Protease Inhibitor Cocktail (Sigma). This leaf homogenate was centrifuged at 16000x  
132 g at 4 °C for 60 seconds. The resulting supernatant was then desalted and concentrated as  
133 described by Cousins *et al.* (2010), and aliquots were incubated with 20 mM  $MgCl_2$  and 10 mM  
134  $NaHCO_3$  at 30 °C for 20 min to fully carbamylate Rubisco. Rubisco content was quantified using  
135 [ $^{14}C$ ]carboxy-arabinitol bisphosphate ( $^{14}C$ ABP)-binding assay (Ruuska *et al.*, 1998, Kubien *et*  
136 *al.*, 2011).

137

### 138 **Sampling for MIMS Analysis**

139 The youngest fully expanded leaves of plants 30 to 40 days after planting were sampled  
140 for Rubisco extraction. The mid vein was removed and approximately 2 g of leaf tissue was  
141 ground in 2 mL of ice-cold extraction buffer (100 mM HEPES pH 7.8, 10 mM DTT, 25 mM  
142  $MgCl_2$ , 1 mM EDTA, 10 mM  $NaHCO_3$ , 1% (g/mL) PVPP, 0.5% (v/v) 100x Triton) with a  
143 mortar and pestle on ice. 67  $\mu$ L of protease inhibitor cocktail (P9599, Sigma-Aldrich, St. Louis,  
144 Missouri) to 2 g of fresh leaf tissue was added to the extraction buffer before grinding. The  
145 homogenized extract was centrifuged at 4 °C, for 10 min, at 17000x g. The supernatant was  
146 collected and desalted using an Econo Pac 10DG column (Bio-Rad), filtered through a Millex  
147 GP 33-mm syringe-driven filter unit (Millipore), and then centrifuged using Amicon Ultra  
148 Ultracel 30K centrifugal filters (Millipore) at 4 °C for 1 hour at 3000x g. The layer maintained  
149 above the filter unit was collected, brought to 20% (v/v) glycerol, flash frozen in liquid nitrogen,  
150 and stored at -80 °C until measured. Rubisco content was determined as described above.

151

### 152 **Radiolabel Measurement of Rubisco Kinetic Parameters**

153           The maximum carboxylation rate of fully activated Rubisco ( $V_{\text{cmax}}$ ) was measured  
154 following the methods of Kubien *et al.* (2011) from 0 to 35 °C, by the incorporation of  $^{14}\text{C}$  into  
155 acid-stable products. This method is later referred to as the ‘single point’ method. Assays were  
156 initiated by the addition of 50  $\mu\text{L}$  of activated extract (as described above) to 250  $\mu\text{L}$  assay buffer  
157 (100 mM Bicine-NaOH (pH 8.2), 1 mM Na-EDTA, 20 mM  $\text{MgCl}_2$ , 5 mM DTT, 400  $\mu\text{M}$  RuBP,  
158 and 11 mM  $\text{NaH}^{14}\text{CO}_3$  [ $\sim 700$  Bq  $\text{nmol}^{-1}$ ]), and stopped after 30 to 60 seconds by adding 250  $\mu\text{L}$   
159 of 1 M formic acid. Samples were dried at 90 °C, and  $^{14}\text{C}$  acid stable products were counted  
160 using a scintillation counter (LS-6500, Beckman-Coulter). Michaelis-Menten parameters for  $\text{CO}_2$   
161 ( $K_C$ ), and apparent  $K_C$  at 21%  $\text{O}_2$  ( $K_C(21\% \text{O}_2)$ ) were determined by assaying Rubisco activity in 7  
162 mL septum-sealed,  $\text{N}_2$ -sparged vials over a range of seven  $\text{NaH}^{14}\text{CO}_3$  concentrations (Paul *et al.*,  
163 1991; Kubien *et al.* 2008. This analysis, referred to as the ‘curve fitting’ method, gave a separate  
164 temperature response of  $k_{\text{catCO}_2}$  from the single point method described above. Rubisco  $S_{\text{C/O}}$  was  
165 determined following the method described by Kane *et al.* (1994). Additional details for these  
166 assays are presented in the supplemental files.

167

### 168 **MIMS Measurement of Rubisco Kinetic Parameters**

169           Rubisco assays were conducted in a 600  $\mu\text{L}$  temperature controlled cuvette linked to an  
170 isotope ratio mass spectrometer (Thermo-Fischer Delta V) and calibrated as previously described  
171 (Cousins *et al.*, 2010; Boyd *et al.*, 2015). Samples were measured similar to Boyd *et al.* (2015);  
172 four oxygen concentrations ranging from 40 to 1600  $\mu\text{M}$ , and five  $\text{CO}_2$  concentrations ranging  
173 from 10 to 200  $\mu\text{M}$  at each oxygen level were made. Measurements were made in 5 °C intervals  
174 from 10 °C to 40 °C, and the same three replicates were measured at each temperature. The assay  
175 buffer contained 200 mM HEPES (pH 7.7 at each measurement temperature), 20 mM  $\text{MgCl}_2$ , 0.1



176 mM  $\alpha$ -hydroxypyridinemethanesulfonic acid ( $\alpha$ -HPMS), 8 mg mL<sup>-1</sup> CA (Sigma), and 0.6 mM  
177 RuBP. 10  $\mu$ L of extract was added per measurement. Rubisco was activated by leaving the  
178 extract at room temperature for 10 minutes prior to returning to ice before measurement.  
179 Additional details for these measurements are presented in the supplemental files.

180

## 181 **Modeling Temperature Responses**

182 The temperature responses of the kinetic parameters were calculated for the equation

$$183 \text{ parameter} = k_{25} e^{(-E_a/R T_K)(298.15-T_K)/(298.15)} \quad \text{Eq. 1}$$

184 where  $k_{25}$  is the value of the parameter at 25 °C,  $E_a$  is the Arrhenius activation energy (kJ mol<sup>-1</sup>),  
185  $R$  is the molar gas constant (0.008314 kJ mol<sup>-1</sup> K<sup>-1</sup>),  $T_K$  is the temperature in Kelvin, and the term  
186  $(298.15-T_K)/298.15$  is the scaling factor so that  $k_{25}$  may be used as the pre-exponential term. The  
187  $E_a$  and  $k_{25}$  values for each Rubisco parameter were calculated by a linear regression of the natural  
188 log of the data plotted against  $(T_K-298.15)/(T_K)$ , such that the y-intercept was equal to natural log  
189 of  $k_{25}$  and the slope was equal to  $E_a/(298.15 R)$ . For comparison the non-transformed  
190 temperature response are presented in Supp. Fig. 3. Three replicates of  $E_a$  and  $k_{25}$  were  
191 determined for each parameter, with the exception of Radiolabel  $S_{C/O}$  where the replication was  
192 four. For all MIMS and Radiolabel comparisons, other than  $k_{\text{catCO}_2}$ , only the curve fitting  
193 methods are compared. For simplicity we exclude the Radiolabel single point when comparing  
194 ratios of kinetic parameters to MIMS. Differences in the  $k_{25}$  and  $E_a$  values were determined by  
195 ANOVA, followed by pair-wise comparison (Tukey HSD) with a significance cutoff of  $p < 0.05$   
196 in Statistix 9 (Analytical Software, Tallahassee, USA).

197 Arrhenius plots for all kinetic parameters were examined for thermal breaks using the  
198 package ‘segmented’ in R, which first tests for differences between slopes using the Davies test

199 (Davies 1987), and then estimates the breakpoints in linear models using maximum likelihood  
200 (Muggeo 2003; Muggeo 2008; R Core Team, 2013, <http://www.R-project.org/>). When  
201 breakpoints in the Arrhenius temperature response plots were statistically valid, the  $E_a$  values  
202 above and below the break points were compared to other  $E_a$  values as described above, the  $k_{25}$   
203 value was held constant when fitting for two  $E_a$  values above and below the breakpoint.

204

## 205 Equations for Reaction Mechanisms

206 Figure 1 depicts the currently hypothesized reaction mechanism of Rubisco as originally  
207 described by Farquhar (1979). The kinetic parameters  $k_{catCO_2}$ ,  $k_{catO_2}$ ,  $K_C$ ,  $K_O$ , and  $S_{C/O}$  can be  
208 described by the individual first order rate constants ( $k$ ) seen in Figure 1 as follows:

$$209 \quad k_{catCO_2} = \frac{k_8 k_9}{k_8 + k_9} \quad \text{Eq. 2}$$

$$210 \quad k_{catO_2} = \frac{k_5 k_9}{k_5 + k_9} \quad \text{Eq. 3}$$

$$211 \quad K_C = \frac{k_7 + k_8}{k_6} \frac{k_9 + k_{10}}{k_8 + k_9} \approx k_{catCO_2} \frac{k_9 + k_{10}}{k_9 k_6} \quad \text{Eq. 4}$$

$$212 \quad K_O = \frac{k_4 + k_5}{k_3} \frac{k_9 + k_{10}}{k_5 + k_9} \approx k_{catO_2} \frac{k_9 + k_{10}}{k_9 k_3} \quad \text{Eq. 5}$$

$$213 \quad S_{C/O} = \frac{k_6}{k_3} \frac{k_4 + k_5}{k_7 + k_8} \frac{k_8}{k_5} \approx \frac{k_6}{k_3} \quad \text{Eq. 6}$$

214 where the subscript indicates the transition state as numbered in Figure 1 by the black circles.

215 The approximations in Equations 4, 5, and 6 are made by assuming the rates of decarboxylation  
216 ( $k_7$ ) and deoxygenation ( $k_4$ ) are negligible.

217 These first order rate constants can be related to temperature using transition state theory  
218 and the Eyring equation

$$219 \quad k = \frac{k_B T}{h} e^{-\Delta G^\ddagger / RT} \quad \text{Eq. 7}$$

220 where  $k_B$  is the Boltzmann constant ( $1.3807 \cdot 10^{-23}$  J K<sup>-1</sup>),  $h$  is the Planck constant ( $6.6261 \cdot 10^{-34}$  J  
221 s),  $\Delta G^\ddagger$  (J mol<sup>-1</sup>) is the standard free energy difference between the transition state and the  
222 substrate (or intermediate). Note the proportionality constant  $\kappa$ , describing the proportion of  
223 vibrations that lead to product formation, has been assumed equal to one and left out of the  
224 equation. The  $\Delta G^\ddagger$  has components of entropy ( $\Delta S^\ddagger$ ) and enthalpy ( $\Delta H^\ddagger$ ) as defined by

$$225 \quad \Delta G^\ddagger = \Delta H^\ddagger - T\Delta S^\ddagger \quad \text{Eq. 8}$$

226 where the double dagger symbol ( $^\ddagger$ ) denotes the transition state.

227

### 228 **Modeling $k$ and $\Delta G^\ddagger$**

229 The proposed Rubisco reaction mechanism (Fig. 1) suggests  $k_{catCO_2}$ ,  $k_{catO_2}$ ,  $K_C$ ,  $K_O$ , and  
230  $S_{C/O}$  are described by complex terms made up of two or more elementary reaction rates  
231 (Farquhar, 1979; Equations 2 through 6). The rate of an elementary reaction ( $k$ ) is related to the  
232 energy barrier for the transition state of the reaction, often referred to as the activation energy  
233 ( $\Delta G^\ddagger$ ). The relationship between  $k$ ,  $\Delta G^\ddagger$ , and temperature is described by the Eyring equation  
234 (Equation 7), where  $\Delta G^\ddagger$  has enthalpic ( $\Delta H^\ddagger$ ) and entropic ( $\Delta S^\ddagger$ ) components (Equation 8). From  
235 Equation 8, a plot of  $\Delta G^\ddagger$  with temperature has a slope of  $\Delta S^\ddagger$  and a y-intercept of  $\Delta H^\ddagger$ . For the  
236 discussion of Rubisco kinetics all numbering of  $k$ ,  $\Delta G^\ddagger$ ,  $\Delta H^\ddagger$ ,  $\Delta S^\ddagger$  refer to reaction steps initially  
237 described by Farquhar (1979) and reproduced in Figure 1. The Eyring equation has been  
238 previously used to calculate  $\Delta G^\ddagger$  values for  $k_{catCO_2}$ ,  $k_{catO_2}$ , and  $S_{C/O}$  (Chen and Spreitzer, 1992;  
239 Tcherkez *et al.*, 2006; McNevin *et al.*, 2007; Tcherkez, 2013). Because  $k_{catCO_2}$  and  $k_{catO_2}$  are first  
240 order rate constants they have been represented as

$$241 \quad -\ln\left(k_{catCO_2} \frac{h}{k_B T}\right) RT = \Delta G_{kcatCO_2}^\ddagger = \Delta H_{kcatCO_2}^\ddagger - T\Delta S_{kcatCO_2}^\ddagger \quad \text{Eq. 9}$$

242 and

243 
$$-\ln\left(k_{catO_2} \frac{h}{k_B T}\right) RT = \Delta G_{kcatO_2}^\ddagger = \Delta H_{kcatO_2}^\ddagger - T \Delta S_{kcatO_2}^\ddagger, \quad \text{Eq. 10}$$

244 and because  $S_{C/O}$  is the ratio of two first order rate constants (Equation 6) it has been represented

245 as

246 
$$\ln(S_{C/O}) RT = \Delta G_3^\ddagger - \Delta G_6^\ddagger = (\Delta H_3^\ddagger - \Delta H_6^\ddagger) - T(\Delta S_3^\ddagger - \Delta S_6^\ddagger). \quad \text{Eq. 11}$$

247 The  $\Delta G^\ddagger$  terms in Equations 9, 10, and 11 can be calculated directly from measured values, and  
248 the  $\Delta H^\ddagger$  and  $\Delta S^\ddagger$  terms would describe a linear fit to the temperature response, assuming  $\Delta H^\ddagger$  and  
249  $\Delta S^\ddagger$  are constant within the temperature range. However, the use of Equations 9, 10, and 11 do  
250 not provide information regarding an elementary rate constant or a corresponding energy barrier.  
251 Further modeling to estimate individual rate constants from the measured data is described  
252 below.

253

#### 254 *Modeling of Radiolabel Data*

255 Each of the rate constants ( $k$ ) in Figure 1 has a corresponding energy of activation ( $\Delta G^\ddagger$ )  
256 from Equation 7), which has a corresponding enthalpic and entropic component ( $\Delta H^\ddagger$  and  $\Delta S^\ddagger$ )  
257 from Equation 8). We assumed that the values of  $\Delta H^\ddagger$  and  $\Delta S^\ddagger$  are constant within the  
258 temperature range. Therefore, we fit Michaelis-Menten parameters calculated from elementary  
259 rate constants using Equations 2 through 6 to the measured Michaelis-Menten parameters by  
260 varying the corresponding  $\Delta H^\ddagger$  and  $\Delta S^\ddagger$  values. All modeling used the solver function in Excel  
261 (2016, Microsoft, Redmon, WA, USA) to minimize the sum of the differences squared between  
262 modeled and measured parameters.

263 The rate constants  $k_8$  (cleavage of carboxylated intermediate) and  $k_9$  (enolization of  
264 RuBP) were calculated from measured  $k_{catCO_2}$  values following the calculations of Tcherkez *et al.*  
265 (2013) such that  $k_8/k_9$  is 0.83 at 25 °C. The rate constant  $k_{10}$  (de-enolization) was modeled

266 assuming  $k_9/k_{10}$  is 0.43 at 25 °C following the calculations of Tcherkez *et al.* (2013), we further  
267 assumed that this ratio remained constant with temperature. This allowed for calculation of the  
268 rate of  $k_6$  (CO<sub>2</sub> addition) as the only remaining unknown when fitting measured values of  $K_C$   
269 with Equation 4 assuming  $k_7$  (de-carboxylation) was negligible. After calculating  $k_6$ ,  $k_3$  (O<sub>2</sub>  
270 addition) was modeled from measured  $S_{C/O}$  values and Equation 6, assuming rate constants  $k_7$   
271 (decarboxylation) and  $k_4$  (deoxygenation) are negligible. Finally, the rate constant  $k_5$  (cleavage of  
272 the oxygenated intermediate) was calculated from measured  $K_O$  values and Equation 7, again  
273 assuming  $k_4$  (deoxygenation) was negligible. This process allowed for estimation of the  
274 temperature response for  $k$  and  $\Delta G^\ddagger$  values for each step of the reaction mechanism listed in  
275 Equations 2 through 6, with the exception of the decarboxylation and deoxygenation steps that  
276 were assumed negligible (Tcherkez *et al.*, 2013; Tcherkez, 2013; Tcherkez, 2016).

277

### 278 *Modeling of MIMS Data*

279 For the MIMS data, where measurements of  $k_{catO_2}$  were available and non-linearity of  
280 Arrhenius plots were observed, the rate constants and corresponding  $\Delta G^\ddagger$ ,  $\Delta H^\ddagger$ , and  $\Delta S^\ddagger$  values  
281 were determined differently. The  $\Delta H^\ddagger$  and  $\Delta S^\ddagger$  values corresponding to the rate constants for  $k_8$   
282 (cleavage of carboxylated intermediate),  $k_5$  (cleavage of oxygenated intermediate), and  $k_9$  (RuBP  
283 enolization) were determined by fitting to measured  $k_{catCO_2}$  and  $k_{catO_2}$  values, assuming  $k_8/k_9$  was  
284 0.83 at 25 °C, and using Equations 2 and 3. Because  $k_{catCO_2}$  showed a breakpoint, it is possible  
285 that  $k_8$  and  $k_9$  have different temperature responses, with a crossover at approximately 25 °C.  
286 However,  $k_{catO_2}$  also showed a breakpoint at 25 °C and the carboxylated intermediate cleavage rate  
287 ( $k_8$ ) is much greater than the oxygenated cleavage rate ( $k_5$ ) because measured  $k_{catCO_2}$  values are  
288 greater than measured  $k_{catO_2}$ . Therefore, a crossover of  $k_5$ ,  $k_8$ , and  $k_9$  at a single temperature is not

289 possible and a breakpoint in  $k_{\text{catCO}_2}$  and  $k_{\text{catO}_2}$  co-occurring at a single temperature cannot be  
290 modeled as a changing rate limiting step. Therefore, we modeled the breakpoint in  $k_{\text{catO}_2}$  by  
291 allowing  $k_5$  to have separate  $\Delta H^\ddagger$  and  $\Delta S^\ddagger$  values above and below the breakpoint, and assuming  
292  $k_9$  had the same values of  $\Delta H^\ddagger$  and  $\Delta S^\ddagger$  above and below the breakpoint. Because  $k_9$  (rate  
293 constant of RuBP enolization) temperature response was assumed constant for models of  $k_{\text{catO}_2}$ , it  
294 was also assumed constant when modeling  $k_{\text{catCO}_2}$ . Therefore,  $k_8$  was allowed to have separate  
295 values of  $\Delta H^\ddagger$  and  $\Delta S^\ddagger$  above and below the breakpoint. The  $k_{10}$  (rate constant of de-eneolization)  
296 was subsequently calculated assuming the ratio  $k_9/k_{10}$  was 0.43 and constant with temperature.  
297 The value  $k_6$  (rate constant of  $\text{CO}_2$  addition) was then calculated from measured  $K_C$  and the  
298 approximation of Equation 4 assuming decarboxylation is negligible. This was also done for  $k_3$   
299 (rate constant for  $\text{O}_2$  addition) using  $K_O$  and the approximation of Equation 5 assuming de-  
300 oxygenation ( $k_4$ ) was negligible. It was required that  $k_6$  and  $k_3$  have separate  $\Delta H^\ddagger$  and  $\Delta S^\ddagger$  values  
301 above and below the breakpoint to model linear Arrhenius plots of  $K_C$  and  $K_O$ . This process  
302 provided estimates of the temperature response for  $k$  and  $\Delta G^\ddagger$  values for each step of the reaction  
303 mechanisms making up the measured Michaelis-Menten parameters (Equations 2 through 6),  
304 with the exception of the decarboxylation and deoxygenation steps, which were assumed  
305 negligible.

306

## 307 RESULTS

### 308 **Breakpoints**

309 The Davies test indicated significant breakpoints for the  $k_{\text{catCO}_2}$ ,  $k_{\text{catO}_2}$ , and  $S_{\text{C/O}}$   
310 temperature response for the MIMS data as well as for the Radiolabel single point measurement  
311 of  $k_{\text{catCO}_2}$  (Table 1, Figures 2 and 4). Both the Davies test and the maximum likelihood  
312 segmented analysis indicated that the breakpoints in these parameters were near 25 °C (Table1).  
313 All other parameters showed no breakpoints in their temperature responses for either the MIMS  
314 or Radiolabel data sets (Table1, Figures 2, 3 and 4).

315

### 316 **Arrhenius Activation Energies and Modeled Value at 25 °C**

317 The  $E_a$ , and  $k_{25}$  for  $k_{\text{catCO}_2}$ ,  $k_{\text{catO}_2}$  (Table 2),  $K_C$ ,  $K_O$ ,  $S_{\text{C/O}}$  (Table 3) and ratios of interest  
318 (Table 4) were calculated from the linear regressions shown in Figures 2 through 4. For the  
319 MIMS derived parameters with breakpoints ( $k_{\text{catCO}_2}$ ,  $k_{\text{catO}_2}$ ,  $S_{\text{C/O}}$ ), and the Radiolabel single point  
320 estimate of  $k_{\text{catCO}_2}$  the lower temperatures  $E_a$  values were larger than  $E_a$  values estimated at  
321 higher temperatures (Table 2 and 3). Above 25 °C, the  $E_a$  values were similar for all parameters  
322 between the Radiolabel and MIMS curve fitting methods. The Radiolabel  $E_a$  for  $k_{\text{catCO}_2}$   
323 determined by curve fitting across all temperatures was intermediate to the two  $E_a$  values  
324 estimated above and below the breakpoint from the single point Radiolabel data. The  $k_{25}$  values  
325 for  $k_{\text{catCO}_2}$  estimated from Radiolabel and MIMS methods were not different from each other, but  
326 were larger than the  $k_{25}$  for  $k_{\text{catO}_2}$  determined by MIMS (Table 2). The  $E_a$  and  $k_{25}$  values for  $K_C$   
327 and  $K_O$  were not significantly different between methods (Table 3). However, the MIMS  $S_{\text{C/O}}$   
328 measured from 10 to 25 °C had a lower (more negative)  $E_a$  value than the MIMS  $S_{\text{C/O}}$   $E_a$  value  
329 measured from 25 to 40 °C and the Radiolabel  $S_{\text{C/O}}$   $E_a$  value (Table 3).

330 The  $E_a$  value for the carboxylation efficiency ( $k_{\text{catCO}_2}/K_C$ ) below 25 °C was significantly  
331 different from zero for the MIMS method, where the carboxylation efficiency increased with  
332 temperature; however, above 25 °C the  $E_a$  was not significantly different from zero (Table 4).  
333 The MIMS  $E_a$  for oxygenation efficiency ( $k_{\text{catO}_2}/K_O$ ) was significantly different from zero above  
334 and below 25 °C (Table 4). The  $E_a$  for the ratio of catalytic rates ( $k_{\text{catCO}_2}/k_{\text{catO}_2}$ ) measured by  
335 MIMS was only significantly different than zero above 25 °C (Table 4). The  $E_a$  for  $K_O/K_C$  was  
336 significantly different from zero for both Radiolabel and MIMS methods (Table 4).

337

### 338 **Modeling $k$ and $\Delta G^\ddagger$**

339 Above 25 °C the  $\Delta G_3^\ddagger - \Delta G_6^\ddagger$  for  $S_{C/O}$  from Radiolabel and MIMS (Fig. 5) are similar to  
340 previous calculations for  $C_3$  species reported by Tcherkez *et al.* (2006). However, the MIMS  
341 entropy difference between  $O_2$  and  $CO_2$  addition ( $\Delta S_3^\ddagger - \Delta S_6^\ddagger$ , slope of line in Fig. 5, see Eq. 11,  
342 Supp. Table 1), from data collected below 25 °C appear more similar to the  $\Delta S_3^\ddagger - \Delta S_6^\ddagger$  of red algae  
343 rather than higher plants, when compared to data presented in Tcherkez *et al.* (2006).

344 The free energy of activation associated with  $k_{\text{catCO}_2}$  ( $\Delta G_{\text{catCO}_2}^\ddagger$ ) plotted against  
345 temperature, increased linearly for the Radiolabel curve fit method, while the  $\Delta G_{\text{catCO}_2}^\ddagger$   
346 calculated from MIMS measurements decreased from 10 to 25 °C and then increased from 25 to  
347 40 °C (Fig. 6). A similar temperature response was also observed for MIMS  $\Delta G_{\text{catO}_2}^\ddagger$ , although  
348 the absolute values of  $\Delta G_{\text{catO}_2}^\ddagger$  are larger than  $\Delta G_{\text{catCO}_2}^\ddagger$  as evident by a lower  $k_{\text{catO}_2}$  compared  
349 to  $k_{\text{catCO}_2}$  at all temperatures (i.e. larger energy barriers result in slower reactions). The slope of  
350  $\Delta G_{\text{catCO}_2}^\ddagger$  values presented in Figure 6 (equivalent to the entropy term  $\Delta S_{\text{catCO}_2}^\ddagger$ , Supp. Table 2)  
351 calculated for Radiolabel and MIMS above 25 °C are slightly larger than those reported for



352 *Nicotiana tabacum* (McNevin *et al.*, 2007). The MIMS  $\Delta S_{k_{\text{catCO}_2}^\ddagger}$  and  $\Delta S_{k_{\text{catO}_2}^\ddagger}$  showed a sign  
353 change above and below the breakpoint (negative slope to positive slope, Fig. 6, Supp. Table 2).

354 Temperature responses of the rate constants ( $k$ ) and corresponding energy barriers of the  
355 transition states ( $\Delta G^\ddagger$ ) are shown in Figure 7, while the modeled  $\Delta H^\ddagger$  and  $\Delta S^\ddagger$  values are  
356 presented in Supplemental Table 3. Calculations of elementary rate constants and corresponding  
357  $\Delta G^\ddagger$  are similar to previous calculations at 25 °C from Tcherkez (2013) and Tcherkez (2016). In  
358 order to model breakpoints in the MIMS  $k_{\text{catCO}_2}$ ,  $k_{\text{catO}_2}$ , and  $S_{\text{C/O}}$  parameters, breakpoints are  
359 needed in the rate constants for the cleavage ( $k_8$  and  $k_5$ ) and for gas addition ( $k_6$  and  $k_3$ ). This is  
360 required because it was not possible to model a simultaneous change in the rate limiting step for  
361 both the  $k_{\text{catCO}_2}$  and  $k_{\text{catO}_2}$  parameter (Supp. Fig. 2). This further required that breakpoints were  
362 needed in the rate constants for CO<sub>2</sub> and O<sub>2</sub> addition ( $k_6$  and  $k_3$ , respectively) to maintain the  
363 observed linearity for  $K_{\text{C}}$  and  $K_{\text{O}}$  Arrhenius plots (Fig. 2).

364

365 DISCUSSION

366 **Temperature Responses of Rubisco Michaelis-Menten Kinetic Parameters**

367 The Rubisco kinetic parameters for *Arabidopsis thaliana* measured with the Radiolabel  
368 and MIMS curve fitting methods were similar at and above 25 °C. Additionally, the modeled 25  
369 °C values ( $k_{25}$ ) and Arrhenius activation energy ( $E_a$ ) above 25 °C agree with many of the  
370 literature values for other C<sub>3</sub>-type Rubiscos, including *in vitro* and *in vivo* measurements of *A.*  
371 *thaliana* (Flexas *et al.*, 2007; Whitney *et al.*, 2011; Walker *et al.*, 2013; Weise *et al.*, 2015;  
372 Galmés *et al.*, 2016). Although, previous reports of Rubisco specificities for CO<sub>2</sub> over O<sub>2</sub> ( $S_{C/O}$ )  
373 at 25 °C vary widely for C<sub>3</sub> species, including for *A. thaliana* which range from below 2125 to  
374 above 2655 (Pa Pa<sup>-1</sup>; Flexas *et al.*, 2007; Whitney *et al.*, 2011; Walker *et al.*, 2013; Weise *et al.*,  
375 2015).

376 Galmés *et al.* (2016) highlighted contradictory trends in the temperature response of  $K_O$   
377 when measured by *in vitro* assay; either increasing or decreasing with temperature (when  
378 expressed in units of molarity; converting between molarity and partial pressure changes the  
379 temperature response because the solubility of O<sub>2</sub> decreases with temperature). Here, both the  
380 Radiolabel and MIMS method show increases in  $K_O$  with temperature, with lower  $E_a$  values  
381 compared to  $K_C$ . The two data sets presented here confirm trends from the growing literature on  
382 C<sub>3</sub> Rubisco temperature responses, at least for values measured above 25 °C.

383 Alternatively, below 25 °C the Radiolabel and MIMS derived parameters had different  
384 temperature responses where the Arrhenius plots of MIMS determined  $k_{catCO_2}$ ,  $k_{catO_2}$ , and  $S_{C/O}$   
385 were non-linear (Fig. 2, Fig. 4). Different temperature responses at high and low temperatures  
386 were interpreted as breakpoints for these kinetic parameters at 25 °C (Fig. 2). However, for the  
387 Radiolabel curve fit data all kinetic parameters appeared sufficiently linear. This could suggest

388 methodology artifacts; however, it is difficult to identify methodological errors that may give rise  
389 to breakpoints given that they have also been observed by different laboratories using varying  
390 methods and species (Badger and Collatz, 1977; Sage 2002, Kubien *et al.*, 2003; Sharwood *et*  
391 *al.*, 2016).

392

### 393 **Evidence for Breakpoints in the Literature**

394 Björkman and Pearcy (1970) first identified a thermal breakpoint occurring in the  
395 temperature response of  $V_{\text{cmax}}$  from two *Atriplex* species. However, in the same publication they  
396 determined that the apparent breakpoints were caused by non-saturating or inhibitory bicarbonate  
397 concentrations at varying temperatures and, when corrected, they obtained sufficiently linear  
398 Arrhenius plots. Subsequently, Badger and Collatz (1977) identified breakpoints in  $k_{\text{catCO}_2}$ ,  $k_{\text{catO}_2}$ ,  
399 and  $K_C$  occurring at 15 °C, with sufficiently linear Arrhenius plots of  $K_O$ . While Badger and  
400 Collatz (1977) did not discuss  $S_{\text{C/O}}$ , using Equation S6 with their data suggests a breakpoint in  
401  $S_{\text{C/O}}$ . Badger and Collatz (1977) hypothesized that breakpoints were the result of possible  
402 changes in enzyme conformation which change the rate limiting step of the reaction mechanism.  
403 Sage (2002) identified breakpoints in  $k_{\text{catCO}_2}$  at 22 °C for *Oryza sativa*, but observed linear  
404 Arrhenius plots for other species. Furthermore, Kubien *et al.* (2003) also observed a breakpoint  
405 in  $k_{\text{catCO}_2}$  between 12 and 18 °C for *Flaveria bidentis*, and suggested it was caused by  
406 deactivation of the enzyme at low temperature, possibly by dissociation of the haloenzyme.  
407 These analyses generally identified  $E_a$  values above the breakpoint similar to what is often  
408 reported in the literature for the temperature response of Rubisco ( $E_a$  for  $k_{\text{catCO}_2}$  ~60 kJ mol<sup>-1</sup>),  
409 with larger  $E_a$  values at low temperatures.

410 Recently, Sharwood *et al.* (2016) suggested breakpoints occurring at 25 °C for  $k_{\text{catCO}_2}$  in  
411 eleven Panicoid grasses and tobacco. While  $E_a$  values at lower temperatures remain larger than  
412 the  $E_a$  values at higher temperatures, Sharwood *et al.*'s (2016) findings differs from the previous  
413 breakpoint publications, because the  $E_a$  below the breakpoint is around the expected value (~60  
414 kJ mol<sup>-1</sup>) and the  $E_a$  above the breakpoint is lower than expected (~30 kJ mol<sup>-1</sup>). Sharwood *et al.*  
415 (2016) did not observe breakpoints in  $S_{\text{CO}}$ , but it is worth noting that they calculated  $S_{\text{CO}}$  from a  
416 separate assay from  $k_{\text{catCO}_2}$  using the ratio of <sup>3</sup>H-glycerate to <sup>3</sup>H-glycolate as described here for  
417 the Radiolabel method. They also did not measure the temperature responses of  $K_C$ ,  $K_O$  or  $k_{\text{catO}_2}$   
418 limiting direct comparisons to the data presented here.

419

#### 420 **Radiolabel Single Point $k_{\text{catCO}_2}$ Breakpoint**

421 The Radiolabel single point method reported here utilized a single bicarbonate  
422 concentration with temperature (11 mM). This method resulted in a breakpoint, having an  $E_a$   
423 value of 79.5 kJ mol<sup>-1</sup> at low temperatures, and 42.1 kJ mol<sup>-1</sup> at higher temperatures (Fig. 2,  
424 Table 2). Similar to Björkman and Pearcy (1970), the linear Arrhenius plot (Radiolabel curve fit)  
425 has an  $E_a$  value intermediate to the two  $E_a$  values determined when using a single bicarbonate  
426 concentration (~59.6 kJ mol<sup>-1</sup>, Fig. 2, Table 2). Because Björkman and Pearcy (1970) suggested  
427 that there could be inhibition at low temperature and sub-saturating concentrations at high  
428 temperature, we plotted the predicted CO<sub>2</sub> concentration achieved by 11 mM NaHCO<sub>3</sub> at each  
429 temperature against the measured and modeled CO<sub>2</sub> response of the enzyme determined by both  
430 Radiolabel and MIMS curve fitting methods (Supp. Fig. 1). The CO<sub>2</sub> concentration provided by  
431 the 11 mM NaHCO<sub>3</sub> is less saturating at higher temperatures because the  $K_C$  of Rubisco

432 increases with temperature and the  $pK_a$  temperature response favors  $HCO_3^-$  at higher  
433 temperatures (Supp. Fig. 1).

434 From the data presented here, the  $CO_2$  concentration appears saturating at 10 and 15 °C,  
435 but becomes increasingly less saturating at higher temperatures, as indicated where the shaded  
436 area intersects the modeled  $CO_2$  response. This suggest the lower  $E_a$  value of the single point  
437 method at high temperatures could be caused by sub-saturating  $CO_2$  concentrations. The sub-  
438 saturating  $CO_2$  concentrations is likely due to both an increase in  $K_C$  with temperature and the  
439 predicted concentration of  $CO_2$  decreases with temperature given the temperature response of the  
440  $pK_a$  (Harned and Bonner, 1945). Alternatively, an inhibitory concentrations of  $CO_2$  was not  
441 observed under any of the measurement conditions.

442

#### 443 **MIMS $k_{catCO_2}$ , $k_{catO_2}$ , and $S_{C/O}$ Breakpoints**

444 The non-linearity of Arrhenius plots of  $k_{catCO_2}$ ,  $k_{catO_2}$ , and  $S_{C/O}$  for the MIMS data were  
445 interpreted as 25 °C breakpoints. Badger and Collatz (1977) also observed breakpoints in  $k_{catCO_2}$ ,  
446  $k_{catO_2}$ , and  $S_{C/O}$ ; however, they observed an additional thermal breakpoint in  $K_C$ , which was not  
447 observed with the MIMS data presented here. As  $S_{C/O}$  is a ratio of  $k_{catCO_2}$ ,  $K_C$ ,  $K_O$ , and  $k_{catO_2}$  (Eq.  
448 S6), the differences in  $S_{C/O}$  breakpoints between Badger and Collatz (1977) and our MIMS data  
449 could suggest different mechanisms driving the thermal response of  $S_{C/O}$ . Furthermore, no  
450 breakpoint in  $S_{C/O}$  has been observed in any study using the  $^3H$ -RuBP method.

451 The breakpoints observed in MIMS  $k_{catCO_2}$  and  $k_{catO_2}$  are unlikely to be caused by  
452 insufficient or inhibitory  $CO_2$  concentrations, as is possible for the breakpoint observed in the  
453 Radiolabel single point  $k_{catCO_2}$  measurement, as sub-saturation or inhibition should be evident in  
454 the  $CO_2$  response curves (Supp. Fig. 1). A breakpoint in both  $k_{catCO_2}$  and  $k_{catO_2}$  could be caused

455 by deactivation of the enzyme as was suggested by Kubien *et al.* (2003). However, deactivation  
456 is unlikely to change the  $k_{\text{catCO}_2}/k_{\text{catO}_2}$  temperature response as was observed in Figure 3C,  
457 because both catalytic rates are expected to be affected in the same way by deactivation.  
458 Alternatively, the observed breakpoints in MIMS could be related to methodology as the  
459 Radiolabel Arrhenius plots presented here for  $k_{\text{catCO}_2}$  and  $S_{\text{C/O}}$  were sufficiently linear.

460 Nevertheless, breakpoints have persisted in the Rubisco literature for over forty years  
461 without sufficient explanation and warrant further investigations into their underlying causes.  
462 Badger and Collatz (1977) suggested changes in the rate-limiting step of the reaction mechanism  
463 brought about by conformational changes. If the elementary rate constants defining a specific  
464 parameter have different temperature responses then this could cause breakpoints if they  
465 crossover causing a change in rate limiting step. The discussion below utilizes the currently  
466 accepted reaction mechanism of Rubisco (Fig. 1) and transition state theory to explore  
467 breakpoints as a function of changes in energy barriers to elementary reactions.

468

## 469 **Rubisco Reaction Mechanisms and Breakpoints**

### 470 *Radiolabel modelling*

471 For the Radiolabel data, where all Arrhenius plots were sufficiently linear, a model of  
472 how the energy barriers for the Rubisco reaction mechanism change with temperature is  
473 presented in Figure 7, Panel C and E, and depicted as a kinetic energy barrier diagram in Panel A  
474 and B. As previously suggested by Tcherkez (2013) the  $k_{\text{catCO}_2}$  and  $k_{\text{catO}_2}$  values can be modeled  
475 assuming identical temperature responses for the rate of enolization ( $k_9$ ), and cleavage for the  
476 carboxylated intermediate ( $k_8$ ) and oxygenated-intermediate ( $k_5$ ). Interestingly, the modeled  
477 addition of  $\text{CO}_2$  ( $\Delta G_6^\ddagger$ ) had high entropic cost leading to a decreasing temperature response for

478 the rate of CO<sub>2</sub> addition ( $k_6$ ), suggesting the reaction becomes slower with increasing  
479 temperature. Additionally, the increase in the energy barrier for CO<sub>2</sub> addition ( $\Delta G_6^\ddagger$ ) is greater  
480 than that for O<sub>2</sub> addition ( $\Delta G_3^\ddagger$ ) such that the ratio  $k_6/k_3$  decreased with temperature. This fits  
481 with the observation that  $\Delta G_3^\ddagger - \Delta G_6^\ddagger$  decreases with temperature (Fig. 5). While our model for  
482 both CO<sub>2</sub> and O<sub>2</sub> addition has positive entropy of the transition states, the greater entropic cost  
483 for CO<sub>2</sub> addition could be the cause of  $S_{CO}$  decreases with temperature, more than would be  
484 assumed if  $\Delta G_3^\ddagger - \Delta G_6^\ddagger$  remained constant with temperature.

485

#### 486 *MIMS modeling*

487 For the MIMS data, the breakpoints observed in  $k_{catCO_2}$  and  $k_{catO_2}$  could be due to changes  
488 in rate limiting step as suggested by Badger and Collatz (1977). For example,  $k_{catCO_2}$  is a function  
489 of the rate of cleavage of the carboxylated-intermediate ( $k_8$ ) and the rate of RuBP enolization  
490 ( $k_9$ ). This would mean that  $k_8$  and  $k_9$  have different temperature response such that they crossover  
491 around the breakpoint observed at 25 °C. However, modeling this change in rate limiting steps  
492 due to different temperature responses cannot simultaneously explain the observed breakpoint in  
493  $k_{catCO_2}$  and  $k_{catO_2}$ , because the value of  $k_5$  defining the cleavage of the oxygenated intermediate is  
494 lower than  $k_8$ . This means that  $k_9$  cannot crossover both  $k_8$  and  $k_5$  at 25 °C (Supp. Fig. 2).

495 Therefore, we proposed that rather than a crossover between elementary rate constants, a  
496 conformation change in the enzyme could change the temperature response for the cleavage  
497 reactions for both carboxylated ( $k_8$ ) and oxygenated ( $k_5$ ) intermediates (Fig. 7). The needed  
498 change in cleavage reactions ( $k_8$  and  $k_5$ ) to model a breakpoint suggests a positive entropy for the  
499 transition state below the breakpoint (decreasing  $\Delta G_5^\ddagger$  with temperature) and a negative entropy  
500 of the transitions state above the breakpoint (increasing  $\Delta G_5^\ddagger$  with temperature). While it seems

501 unlikely that such an entropy change could be driven by a conformation change in the enzyme  
502 brought about by such minimal changes in temperature, a similar change in entropy for  $k_{\text{catCO}_2}$   
503 was observed between wild type *Nicotiana tabacum* and a mutant (L335V) Rubisco (McNevin *et*  
504 *al.*, 2007). The amino acid substitution in the mutant was suggested to affect the loop that closes  
505 over RuBP as it is bound. This could suggest that the entropy changes to the cleavage reactions  
506 ( $k_5$  and  $k_8$ ) proposed here maybe possible given enzyme conformational changes with  
507 temperature.

508         The MIMS data also indicates a breakpoint in  $S_{\text{C/O}}$  suggesting larger  $E_a$  values at low  
509 temperatures compared to higher temperatures, therefor the term  $\Delta G_3^\ddagger - \Delta G_6^\ddagger$  was modeled with a  
510 non-linear temperature response (Fig. 5). As  $S_{\text{C/O}}$  can be approximated as  $k_6/k_3$ , this could  
511 suggest a breakpoint in the temperature response of CO<sub>2</sub> addition ( $k_6$ ), O<sub>2</sub> addition ( $k_3$ ), or both.  
512 The individual values for  $k_6$  and  $k_3$  cannot be derived from  $S_{\text{C/O}}$  measurements; however, in order  
513 for the observed constant temperature response of  $K_C$  and  $K_O$  to remain constant with  
514 temperature the cleavage reactions discussed above need to be offset by breakpoints in both  $k_6$   
515 and  $k_3$  (Fig. 7F). Therefore, to model the reaction mechanism suggested by MIMS  
516 measurements, breakpoints in four elementary rate constants are needed to describe the  
517 breakpoints in  $k_{\text{catCO}_2}$ ,  $k_{\text{catO}_2}$ , and  $S_{\text{C/O}}$  but not in  $K_C$  or  $K_O$ .

518         The modeling presented here is largely based on isotope exchange studies, which suggest  
519 similar energy barriers between enolization ( $\Delta G_9^\ddagger$ ) and cleavage ( $\Delta G_8^\ddagger$ ). However, these  
520 measurements have been limited to 25 °C (Van Dyk and Schloss, 1986; Tcherkez *et al.*, 2013)  
521 and extension of isotope exchange studies to temperature responses would help constrain how  
522 the elementary rate constants vary with temperature. Contrary to the above proposal that the  
523 cleavage transition state ( $k_8$ ) undergoes changes above and below 25 °C, is that Rubisco



524 discrimination against  $^{13}\text{CO}_2$  is believed to remain constant with temperature (Christeller *et al.*,  
525 1976). If the rate of cleavage ( $k_8$ ) decreases, then the decarboxylation reaction ( $k_7$ ) may increase,  
526 or the ratio  $k_7/k_8$  could increase, which would change Rubisco discrimination against  $^{13}\text{CO}_2$ .  
527 Furthermore, the above modeling relies on the assumption that decarboxylation ( $k_7$ ) was  
528 negligible at all temperatures; therefore, changes in fractionation with temperature for an enzyme  
529 exhibiting breakpoints should help test the validity of these assumptions.

530

## 531 CONCLUSION

532 The measured temperature responses of Rubisco kinetic parameters were consistent  
533 between methods at and above 25 °C; however, there were thermal breakpoints at ~ 25 °C in the  
534 MIMS dataset for  $k_{\text{catCO}_2}$ ,  $k_{\text{catO}_2}$ , and  $S_{\text{C/O}}$ . Additionally, the Radiolabel method using a single  
535 bicarbonate concentration showed a breakpoint for  $k_{\text{catCO}_2}$  at 25 °C but the curve fitting did not,  
536 suggesting this breakpoint was caused in part by non-saturating  $\text{CO}_2$  concentrations at higher  
537 temperatures. Previous studies suggest that breakpoints are caused by either a change in the rate  
538 limiting step of the reaction mechanism or deactivation of the enzyme at low temperatures. By  
539 modeling elementary steps of the reaction mechanism, we showed that a simple change in rate  
540 limiting step is not sufficient to explain simultaneous breakpoints in both  $k_{\text{catCO}_2}$  and  $k_{\text{catO}_2}$ , and  
541 that breakpoints in the elementary rate constants are likely needed. Additionally, it is unclear  
542 how deactivation would cause the observed breakpoint in  $S_{\text{C/O}}$ . Moving forward, the temperature  
543 response of isotopic substitutions experiments would advance our understanding of how  
544 elementary rate constants change in relation to one another with temperature.

545

546

547 ACKNOWLEDGEMENT

548           This work was supported by the Division of Chemical Sciences, Geosciences, and  
549 Biosciences, Office of Basic Energy Sciences, Department of Energy (grant no. DE–FG02–  
550 09ER16062), the National Science Foundation (Major Research Instrumentation grant no.  
551 0923562), the National Science and Engineering Research Council of Canada (Discovery grant  
552 no. 327103; and PGS-D scholarship to APC), and the Seattle chapter of the Achievement  
553 Rewards for College Scientists Foundation (R.A.B.). A.B.C. and D.S.K. proposed the original  
554 concept and design for the project; R.A.B. and A.P.C. performed the experiments and data  
555 analysis; R.A.B. wrote the article with the contributions of all the authors; A.B.C. supervised and  
556 complemented the writing. We would like to thank Chuck Cody for maintaining plant growth  
557 facilities and current members of Cousins Lab for helpful and insightful discussions.

558

559 LITERATURE CITED

560 Andrews T.J., Lorimer G.H., Tolbert N.E. (1973) Ribulose diphosphate oxygenase. I. Synthesis  
561 of phosphoglycolate by fraction-1 protein of leaves. *Biochemistry* 12(1), 11-18.

562

563 Badger M.R. and Collatz G.J. (1977) Studies on the kinetic mechanism of ribulose-1, 5-  
564 bisphosphate carboxylase and oxygenase reactions, with particular reference to the effect of  
565 temperature on kinetic parameters. *Carnegie Institute of Washington, Yearbook* 76, 355-361.

566

567 Björkman O. and Pearcy R.W. (1970) Effect of growth temperature on the temperature  
568 dependence of photosynthesis in vivo and on CO<sub>2</sub> fixation by carboxydismutase *in vitro* in C<sub>3</sub>  
569 and C<sub>4</sub> species. *Carnegie Institution of Washington, Yearbook* 70, 511-520.

570

571 Bowes G., Ogren W.L., Hageman R.H. (1971) Phosphoglycolate production catalyzed by  
572 ribulose diphosphate carboxylase. *Biochemical and Biophysical Research Communications*  
573 45(3), 716-722.

574

575 Boyd R.A., Gandin A., Cousins A.B. (2015) Temperature Responses of C<sub>4</sub> Photosynthesis:  
576 Biochemical Analysis of Rubisco, Phosphoenolpyruvate Carboxylase, and Carbonic Anhydrase  
577 in *Setaria viridis*. *Plant Physiology* 169, 1850-1861.

578

579 Chen Z. and Spreitzer R. J. (1992) How various factors influence the CO<sub>2</sub>/O<sub>2</sub> specificity of  
580 Ribulose-1, 5-bisphosphate carboxylase/oxygenase. *Photosynthesis Research* 31(2), 157-164.

581

582 Christeller J.T., Laing W.A., Troughton J.H. (1976) Isotope Discrimination by Ribulose 1,5-  
583 Diphosphate Carboxylase. *Plant Physiology* 57(4), 580-582.  
584  
585 Cousins A.B., Ghannoum O., von Caemmerer S., Badger M.R. (2010) Simultaneous  
586 determination of Rubisco carboxylase and oxygenase kinetic parameters in *Triticum aestivum*  
587 and *Zea mays* using membrane inlet mass spectrometry. *Plant, Cell & Environment* 33, 444-452.  
588  
589 Crafts-Brander S.J. and Salvucci M.E. (2000) Rubisco activase constrains the photosynthetic  
590 potential of leaves at high temperature and CO<sub>2</sub>. *Proceedings of the National Academy of*  
591 *Sciences of the United States of America* 97(24), 13430-13435.  
592  
593 Davies R.B. (1987) Hypothesis testing when a nuisance parameter is present only under the  
594 alternatives. *Biometrika* 74(1), 33-43.  
595  
596 Edsall J.T., Wyman J. (1958) Carbon dioxide and carbonic acid. In: *Biophysical Chemistry* (eds.  
597 J.T. Edsall, J. Wyman), pp 550-590. Academic Press, New York, London.  
598  
599 Farquhar G.D. (1979) Models describing the kinetics of ribulose biphosphate carboxylase-  
600 oxygenase. *Archives of Biochemistry and Biophysics*, 193(2), 456-468.  
601  
602 Flexas J., Ortuño M., Ribas-Carbo M., Diaz-Espejo A., Flórez-Sarasa I., Medrano H. (2007)  
603 Mesophyll conductance to CO<sub>2</sub> in *Arabidopsis thaliana*. *New Phytologist* 175, 501-511.  
604

605 Galmés J., Hermida-Carrera C., Laanisto L., Niinemets U. (2016) A compendium of temperature  
606 responses of Rubisco kinetic traits: variability among and within photosynthetic groups and  
607 impacts on photosynthesis modeling. *Journal of Experimental Botany* 67(17), 5067-5091.

608

609 Harned H.S. and Bonner F.T. (1945) The first ionization of carbonic acid in aqueous solutions of  
610 sodium chloride. *Journal of the American Chemical Society* 67, 1026-1031.

611

612 Hurwitz J., Jakoby W.B., Horecker B.L. (1956) On the mechanism of CO<sub>2</sub> fixation leading to  
613 phosphoglyceric acid. *Biochimica et Biophysica Acta* 22(1), 194-195.

614

615 Jordan D.B. and Ogren W.L. (1981) A sensitive assay procedure for simultaneous determination  
616 of ribulose-1, 5-bisphosphate carboxylase and oxygenase activities. *Plant Physiology* 67(2), 237-  
617 245.

618

619 Kane H.J., Viil J., Entsch B., Paul K., Morell M.K., Andrews T.J. (1994) An improved method  
620 for measuring the CO<sub>2</sub>/O<sub>2</sub> specificity of ribulose-bisphosphate carboxylase-oxygenase.  
621 *Australian Journal of Plant Physiology* 21, 449-461.

622

623 Kubien D.S., Brown C.M., Kane H.J. (2011) Quantifying the amount and activity of rubisco in  
624 leaves. In: *Methods in Molecular Biology, Photosynthesis Research Protocols* (ed. R.  
625 Carpentier), pp 349-362. Humana Press, New York.

626

627 Kubien D.S., von Caemmerer S., Furbank R.T., and Sage, R.F. (2003) C<sub>4</sub> photosynthesis at low  
628 temperature. A study using transgenic plants with reduced amounts of Rubisco. *Plant Physiology*  
629 132(3), 1577-1585.

630

631 Kubien D.S., Whitney S.M., Moore P.V., Jesson L.K. (2008) The biochemistry of Rubisco in  
632 *Flaveria*. *Journal of Experimental Botany* 59, 1767-1777.

633

634 McNevin D.B., Badger M.R., Kane H.J., Farquhar G.D. (2006) Measurement of (carbon) kinetic  
635 isotope effect by Rayleigh fractionation using membrane inlet mass spectrometry for CO<sub>2</sub>-  
636 consuming reactions. *Functional Plant Biology* 33(12), 1115-1128.

637

638 McNevin D.B., Badger M.R., Whitney S.M., von Caemmerer S., Tcherkez G.G., Farquhar, G.D.  
639 (2007) Differences in carbon isotope discrimination of three variants of d-ribulose-1, 5-  
640 biphosphate carboxylase/oxygenase reflect differences in their catalytic mechanisms. *Journal of*  
641 *Biological Chemistry* 282(49), 36068-36076.

642

643 Muggeo V.M. (2003) Estimating regression models with unknown break - points. *Statistics in*  
644 *Medicine* 22(19), 3055-3071.

645

646 Muggeo V.M. (2008) Segmented: An R package to fit regression models with broken-line  
647 relationships. *R news* 8(1), 20-25.

648

649 O'Leary M.H., Madhavan S., Paneth P. (1992) Physical and chemical basis of carbon isotope  
650 fractionation in plants. *Plant, Cell & Environment* 15(9), 1099-1104.  
651

652 Paul K., Morell M.K., Andrews T.J. (1991) Mutations in the small subunit of ribulose  
653 biphosphate carboxylase affect subunit binding and catalysis. *Biochemistry* 30, 10019-10026.  
654

655 Perdomo J.A., Cavanagh A.P., Kubien D.S., Galmés J. (2015) Temperature dependence of *in*  
656 *vitro* Rubisco kinetics in species of Flaveria with different photosynthetic mechanisms.  
657 *Photosynthesis Research* 124, 67-75.  
658

659 Pittermann J. and Sage R.F. (2000) Photosynthetic performance at low temperature of *Bouteloua*  
660 *gracilis* Lag., a high-altitude C<sub>4</sub> grass from the Rocky Mountains, USA. *Plant, Cell &*  
661 *Environment* 23(8), 811-823.  
662

663 Ruuska S., Andrews T.J., Badger M.R., Hudson G.S., Laisk A., Price G.D., von Caemmerer S.  
664 (1998) The interplay between limiting processes in C-3 photosynthesis studied by rapid-response  
665 gas exchange using transgenic tobacco impaired in photosynthesis. *Australian Journal of Plant*  
666 *Physiology* 25, 859-870.  
667

668 Sage R.F. (2002) Variation in the  $k_{cat}$  of Rubisco in C<sub>3</sub> and C<sub>4</sub> plants and some implications for  
669 photosynthetic performance at high and low temperature. *Journal of Experimental Botany* 53,  
670 609-620.  
671

672 Sage R.F., Santrucek J., Grise D.J. (1995) Temperature effects on the photosynthetic response of  
673 C<sub>3</sub> plants to long-term CO<sub>2</sub> enrichment. *Vegetatio* 121, 67-77.

674

675 Sander R. (2015) Compilation of Henry's law constants (version 4.0) for water as solvent.  
676 *Atmospheric Chemistry and Physics* 15, 4399-4981.

677

678 Sharwood R.E., Ghannoum O., Kapralov M.V., Gunn L.H., Whitney S.M. (2016) Temperature  
679 responses of Rubisco from Paniceae grasses provide opportunities for improving C<sub>3</sub>  
680 photosynthesis. *Nature Plants* 2, 16186.

681

682 Shay P.E., Kubien D.S. (2013) Field analysis of photoprotection in co - occurring cool climate  
683 C<sub>3</sub> and C<sub>4</sub> grasses. *Physiologia Plantarum* 147(3), 316-328.

684

685 Spreitzer R.J., Salvucci M.E. (2002) Rubisco: structure, regulatory interactions, and possibilities  
686 for a better enzyme. *Annual Review of Plant Biology* 53(1), 449-475.

687

688 Tcherkez G. (2013) Modelling the reaction mechanism of ribulose-1, 5-bisphosphate  
689 carboxylase/oxygenase and consequences for kinetic parameters. *Plant, Cell & Environment*  
690 36(9), 1586-1596.

691

692 Tcherkez G. (2016) The mechanism of Rubisco-catalysed oxygenation. *Plant, Cell &*  
693 *Environment* 39(5), 983-997.

694



695 Tcherkez G.G., Bathellier C., Stuart-Williams H., Whitney S., Gout E., Bligny R., Farquhar G.D.  
696 (2013) D<sub>2</sub>O solvent isotope effects suggest uniform energy barriers in ribulose-1, 5-bisphosphate  
697 carboxylase/oxygenase catalysis. *Biochemistry* 52(5), 869-877.

698

699 Tcherkez G.G., Farquhar G.D., Andrews T.J. (2006) Despite slow catalysis and confused  
700 substrate specificity, all ribulose bisphosphate carboxylases may be nearly perfectly optimized.  
701 *Proceedings of the National Academy of Sciences* 103(19), 7246-7251.

702

703 Tieszen L. and Sigurdson D. (1973) Effect of temperature on carboxylase activity and stability in  
704 some Calvin cycle grasses from the arctic. *Arctic, Antarctic, and Alpine Research* 5(1), 59-66.

705

706 Ubierna N., Gandin A., Boyd R.A., Cousins A.B. (2017) Temperature response of mesophyll  
707 conductance in three C<sub>4</sub> species calculated with two methods: <sup>18</sup>O discrimination and *in vitro*  
708 V<sub>pmax</sub>. *New Phytologist* 214(1), 66-80.

709

710 Van Dyk D.E. and Schloss J.V. (1986) Deuterium isotope effects in the carboxylase reaction of  
711 ribulose-1, 5-bisphosphate carboxylase/oxygenase. *Biochemistry*, 25(18), 5145-5156.

712

713 von Caemmerer S. (2000) *Biochemical models of leaf photosynthesis*. Csiro Publishing,  
714 Collingwood, Australia

715

716 Walker B., Ariza L.S., Kaines S., Badger M.R., Cousins A.B. (2013) Temperature response of *in*  
717 *vivo* Rubisco kinetics and mesophyll conductance in *Arabidopsis thaliana*: comparisons to  
718 *Nicotiana tabacum*. *Plant, Cell & Environment* 36, 2108-2119.

719

720 Weise S.E., Carr D.J., Bourke A.M., Hanson D.T., Swarthout D., Sharkey T.D. (2015) The *arc*  
721 mutants of *Arabidopsis* with fewer large chloroplasts have a lower mesophyll conductance.  
722 *Photosynthesis Research* 124(1), 117-126.

723

724 Whitney S.M., Houtz R.L., Alonso H. (2011) Advancing our understanding and capacity to  
725 engineer nature's CO<sub>2</sub>-sequestering enzyme, Rubisco. *Plant Physiology* 155(1), 27-35.

726

727

**Table 1.** Testing for thermal breaks for all kinetic parameters. Arrhenius plots were examined using the package ‘segmented’ in R (R Core Team, 2013, <http://www.R-project.org/>), which determines significance of breakpoints in linear models and estimates breakpoint locations as described by Davies (1987). Additionally, breakpoint locations and confidence intervals (CI, lower and upper) were independently estimated using a maximum likelihood test (Muggeo 2003; Muggeo 2008). Where \* indicates a p-value < 0.05 for the Davies test and ns = not significant.

| Method     | Parameter                     | Davies Test               |         | Maximum likelihood        |            |            |
|------------|-------------------------------|---------------------------|---------|---------------------------|------------|------------|
|            |                               | Estimated Breakpoint (°C) | p-value | Estimated Breakpoint (°C) | CI (lower) | CI (upper) |
| Radiolabel |                               |                           |         |                           |            |            |
|            | $k_{catCO_2}$<br>single point | 26.8                      | *       | 25.1                      | 5.3        | 36.9       |
|            | $k_{catCO_2}$<br>curve fit    | -                         | ns      |                           |            |            |
|            | $k_{catO_2}$                  | -                         | -       |                           |            |            |
|            | $K_C$                         | -                         | ns      |                           |            |            |
|            | $K_O$                         | -                         | ns      |                           |            |            |
|            | $S_{C/O}$                     | -                         | ns      |                           |            |            |
| MIMS       |                               |                           |         |                           |            |            |
|            | $k_{catCO_2}$                 | 25.3                      | *       | 25.3                      | 23.1       | 31.5       |
|            | $k_{catO_2}$                  | 25.3                      | *       | 25.5                      | 24.3       | 32.6       |
|            | $K_C$                         | -                         | ns      |                           |            |            |
|            | $K_O$                         | -                         | ns      |                           |            |            |
|            | $S_{C/O}$                     | 25.4                      | *       | 25.2                      | 15.0       | 27.6       |

728

729

**Table 2.** Comparison of  $k_{25}$  and  $E_a$  values for  $k_{cat}$  measurements from the different methods.

The  $k_{25}$  and  $E_a$  values are the mean of three to four replicates, calculated from linear regressions of Arrhenius plots. The temperature ranges for each regression were determined by segment analysis. Superscripts indicate significant differences between groups (Tukey HSD,  $p < 0.05$ ).

| Method       | Temperature (°C) | Parameter                  | $k_{25}$                | $E_a$                     |
|--------------|------------------|----------------------------|-------------------------|---------------------------|
| Radiolabel   |                  |                            |                         |                           |
| single point | 0 - 25           | $k_{catCO_2}$ ( $s^{-1}$ ) | 3.50 ±0.20 <sup>A</sup> | 79.53 ±2.03 <sup>a</sup>  |
|              | 25 - 40          |                            | -- --                   | 42.11 ±3.45 <sup>c</sup>  |
| curve fit    | 10 - 35          |                            | 3.10 ±0.07 <sup>A</sup> | 59.64 ±3.93 <sup>b</sup>  |
| MIMS         | 10 - 25          |                            | 3.53 ±0.25 <sup>A</sup> | 90.36 ±1.03 <sup>a</sup>  |
|              | 25 - 40          |                            | -- --                   | 62.20 ±2.68 <sup>b</sup>  |
|              | 10 - 25          | $k_{catO_2}$ ( $s^{-1}$ )  | 1.38 ±0.05 <sup>B</sup> | 92.95 ±7.31 <sup>a</sup>  |
|              | 25 - 40          |                            | -- --                   | 47.11 ±2.33 <sup>bc</sup> |

730

731

732

733

734

735

736

737

738

**Table 3.** Comparison of  $K_C$ ,  $K_O$ ,  $S_{C/O}$  parameters  $k_{25}$  and  $E_a$  resulting from the different methods are shown. No differences were observed in  $k_{25}$  between methods. No differences were observed in  $E_a$  values for  $K_C$  and  $K_O$  values between methods (ANOVA). The superscripts next to the  $E_a$  values indicate significant differences for the  $S_{C/O}$  values (Tukey HSD,  $p < 0.05$ ).

| Method     | Temperature Range (°C) | Parameter | $k_{25}$ (Pa) |       | $E_a$ (kJ mol <sup>-1</sup> ) |                    |
|------------|------------------------|-----------|---------------|-------|-------------------------------|--------------------|
| Radiolabel | 10 - 35                | $K_C$     | 36            | ±2    | 63.09                         | ±6.23              |
| MIMS       | 10 - 40                |           | 34            | ±1    | 62.62                         | ±3.44              |
| Radiolabel | 15 - 35                | $K_O$     | 23100         | ±3430 | 16.89                         | ±2.59              |
| MIMS       | 10 - 40                |           | 24400         | ±701  | 17.01                         | ±2.48              |
| Radiolabel | 5 - 40                 | $S_{C/O}$ | 2003          | ±22   | -28.66                        | ±0.51 <sup>b</sup> |
| MIMS       | 10 - 25                |           | 1814          | ±117  | -48.19                        | ±4.17 <sup>a</sup> |
|            | 25 - 40                |           | --            | --    | -30.51                        | ±6.41 <sup>b</sup> |

739

740

**Table 4.** The  $E_a$  and  $k_{25}$  parameters for  $k_{\text{catCO}_2}/K_C$ ,  $k_{\text{catO}_2}/K_O$ ,  $k_{\text{catCO}_2}/k_{\text{catO}_2}$ , and  $K_O/K_C$  ratios. The  $E_a$  parameters were tested to determine if they were significantly different than zero (t-test), where the \* next to the  $E_a$  values indicates a p-value below 0.05.

| Method     | Temperature Range (°C) | Parameter                              | $k_{25}$ |       | $E_a$  |        |
|------------|------------------------|----------------------------------------|----------|-------|--------|--------|
| Radiolabel | 10 - 35                | $k_{\text{catCO}_2}/K_C$               | 0.09     | ±0.00 | -3.45  | ±3.94  |
| MIMS       | 10 - 25                | ( $\text{s}^{-1} \text{Pa}^{-1}$ )     | 0.10     | ±0.01 | 27.75  | ±3.38* |
|            | 25 - 40                |                                        | --       | --    | -0.41  | ±6.10  |
| MIMS       | 10 - 25                | $k_{\text{catO}_2}/K_O$                | 0.06     | ±0.00 | 75.93  | ±7.41* |
|            | 25 - 40                | ( $\text{s}^{-1} \text{kPa}^{-1}$ )    | --       | --    | 30.09  | ±0.70* |
| MIMS       | 10 - 25                | $k_{\text{catCO}_2}/k_{\text{catO}_2}$ | 2.55     | ±0.16 | -2.58  | ±6.73  |
|            | 25 - 40                |                                        | --       | --    | 15.10  | ±4.92* |
| Radiolabel | 15 - 35                | $K_O/K_C$                              | 0.65     | ±0.11 | -46.20 | ±8.80* |
| MIMS       | 10 - 40                | ( $\text{kPa Pa}^{-1}$ )               | 0.71     | ±0.01 | -45.60 | ±2.57* |

741

742

743

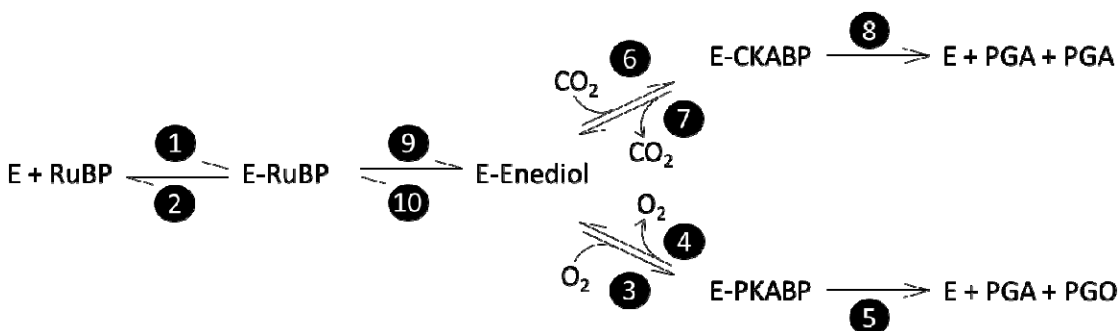

744

745 **Figure 1.** Elementary reactions of Rubisco-catalyzed carboxylation and oxygenation reproduced  
 746 from Farquhar (1979). Each reaction, forward and reverse, is numbered in a filled circle  
 747 following the numbering from Farquhar (1979). Steps 8 and 5 are written as irreversible  
 748 reactions. Step 8 includes cleavage, hydration, and reprotonation as a single step. Step 5 includes  
 749 cleavage and hydration as a single step. Each step is associated with a rate constant ( $k$ ) and  
 750 energy of activation ( $\Delta G^\ddagger$ ) following the same numbering as shown in filled circles.  
 751 Abbreviations as follows: E, free activated enzyme; RuBP, D-ribulose-1,5-bisphosphate; E-  
 752 RuBP; enzyme bound RuBP; E-Enediol, enzyme bound 2,3-enediolate form of RuBP; CO<sub>2</sub>,  
 753 carbon dioxide; E-CKABP, enzyme bound carboxyketone intermediate; PGA, 3-phospho-D-  
 754 glycerate; O<sub>2</sub>, oxygen; E-PKABP, peroxo intermediate; PGO, 2-phospho-glycolate.  
 755

756

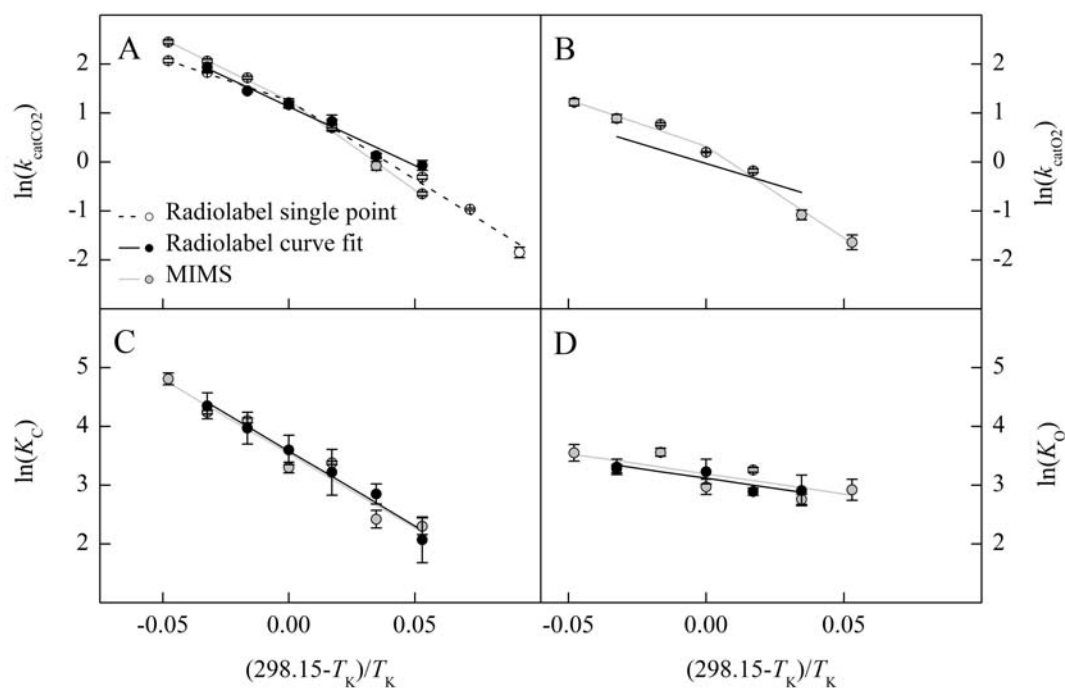

757

758 **Figure 2.** The natural log of Rubisco parameters from *Arabidopsis thaliana* measured using  
 759 Radiolabel (single point, open circle; curve fit, black circle) and MIMS (grey circle) methods are  
 760 plotted against the inverse of the temperature in Kelvin offset to a y-intercept of 25 °C. The  
 761 temperature response of catalytic turnover for CO<sub>2</sub> ( $k_{\text{catCO}_2}$ , s<sup>-1</sup>, Panel A), and O<sub>2</sub> ( $k_{\text{catO}_2}$ , s<sup>-1</sup>, Panel  
 762 B), the Michaelis-Menten constant for CO<sub>2</sub> ( $K_C$ , Pa, Panel C), and O<sub>2</sub> ( $K_O$ , kPa, Panel D) are  
 763 shown. The lines represent the model fit to the measured data. The Radiolabel  $k_{\text{catO}_2}$  model in  
 764 panel B was determined from the relationship with  $S_{C/O}$  described by Equation S6.

765



766

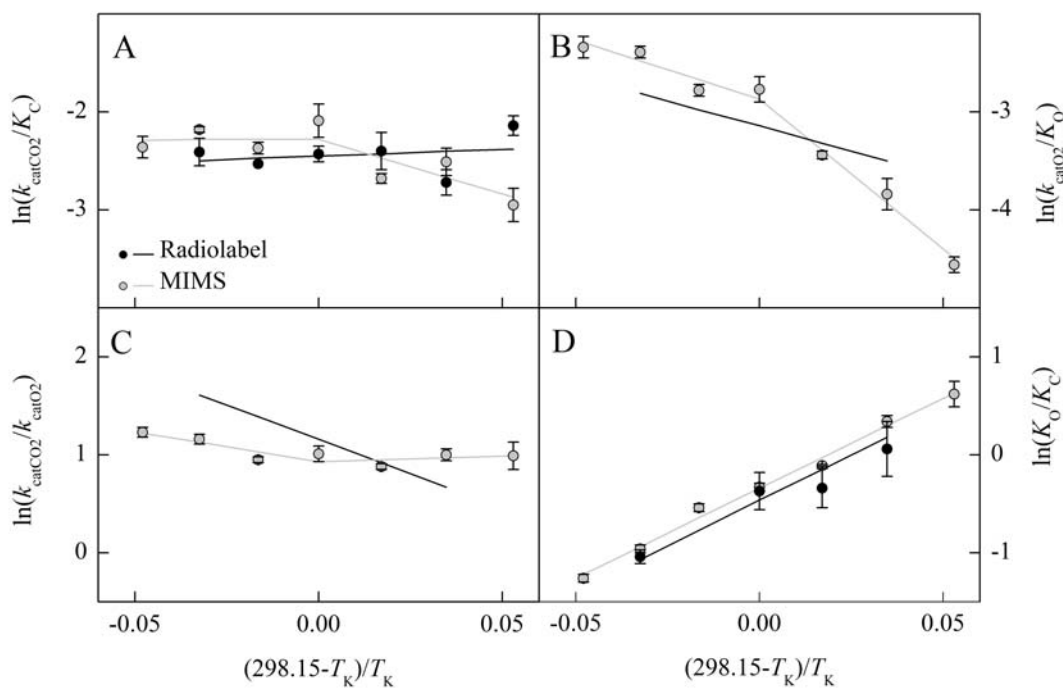

767

768 **Figure 3.** The natural log of the Rubisco parameter ratios from *Arabidopsis thaliana* measured  
 769 using Radiolabel (black circle) and MIMS (grey circle) are plotted against the inverse of the  
 770 temperature in Kelvin offset to a y-intercept of 25 °C. The temperature response of the catalytic  
 771 efficiency of the carboxylation ( $k_{\text{catCO}_2} / K_C$ , Panel A) and oxygenation ( $k_{\text{catO}_2} / K_O$ , Panel B)  
 772 reactions, catalytic turnover ratio for CO<sub>2</sub> over O<sub>2</sub> ( $k_{\text{catCO}_2} / k_{\text{catO}_2}$ , Panel C), and the Michaelis-  
 773 Menten constant ratio for O<sub>2</sub> over CO<sub>2</sub> ( $K_O / K_C$ , Panel D) are shown. Lines represent the  
 774 combination of models represented in Figure 2 and are not the result of linear regressions to the  
 775 ratios.

776

777

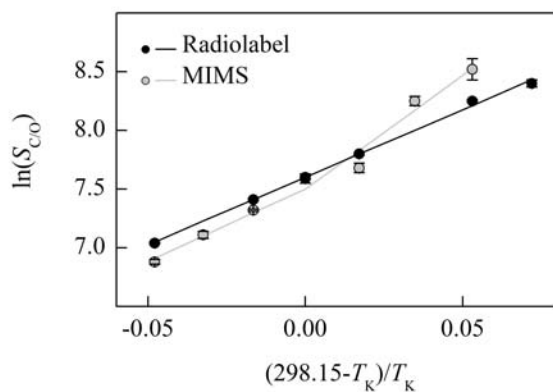

778

779 **Figure 4.** The natural log of Rubisco specificity for CO<sub>2</sub> over O<sub>2</sub> ( $S_{C/O}$ ) from *Arabidopsis*  
780 *thaliana* measured using Radiolabel (black circle) and MIMS (grey circle) methods are plotted  
781 against the inverse of the temperature in Kelvin offset to a y-intercept of 25 °C. The black line  
782 represents the model fit to the measured Radiolabel values. The grey line was determined from  
783 the relationship of  $S_{C/O}$  to the parameters presented in Figure 2, described by Equation S6.

784

785

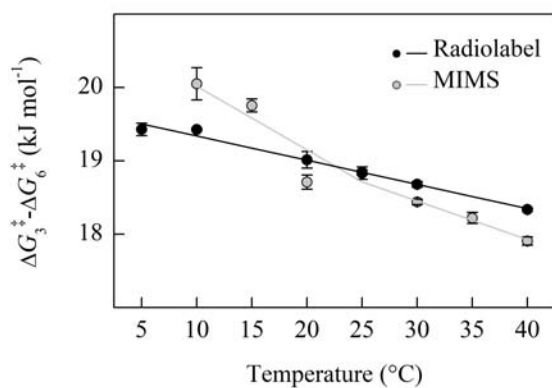

786

787 **Figure 5.** The temperature response of  $\Delta G_3^\ddagger - \Delta G_6^\ddagger$  calculated from the data presented in Figure 4.

788 Both measurement methods show a decrease with temperature. Solid black circles are the mean

789 of four replicates measured using Radiolabel, filled grey circles are the means from three

790 replicates using MIMS, standard error is shown. The solid lines indicate the linear regression fit

791 to calculated values.

792

793

794

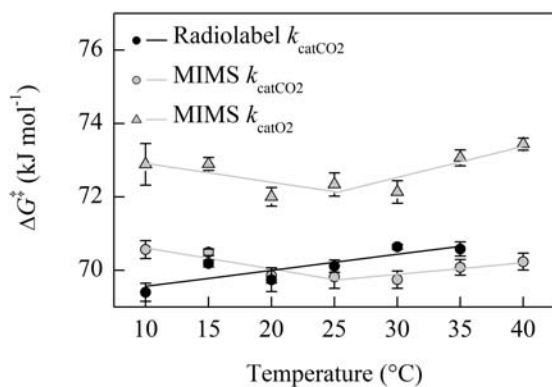

795

796 **Figure 6.** The temperature response of  $\Delta G_{kcatCO_2}^\ddagger$  for MIMS and Radiolabel methods, and  
797  $\Delta G_{kcatCO_2}^\ddagger$  for MIMS calculated from the data presented in Figure 2. Two regressions were fit to  
798 the MIMS data on either side of the 25 °C breakpoint, a single regression is fit to the Radiolabel  
799 data. Solid black circles are the mean of three replicates measured using Radiolabel, filled grey  
800 circles are the means from three replicates using MIMS, standard error is shown.

801

802

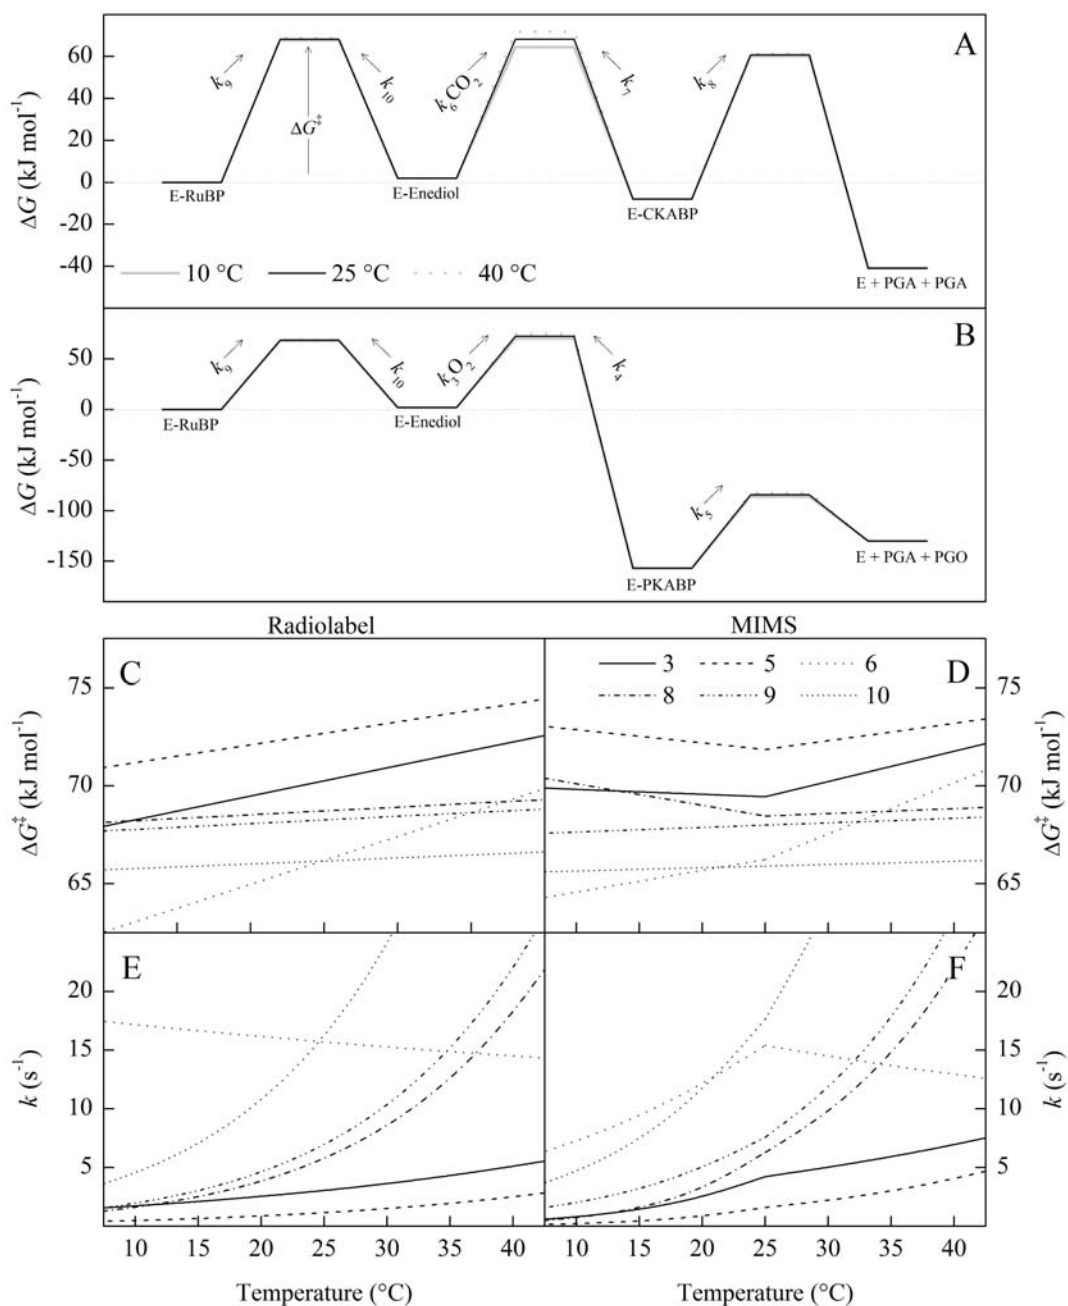

803

804

805 **Figure 7.** A kinetic energy barrier diagram showing the modeled temperature responses of the  
 806 energy barrier to the transition state ( $\Delta G^\ddagger$ ) and the corresponding first order rate constant  $k$ . The  
 807  $\Delta G^\ddagger$  and  $k$  are indicated by the numbered step of the reaction following Figure 1. The  
 808 assumptions made for this model are stated in the methods section. For steps 3 and 6 ( $O_2$  and

809 CO<sub>2</sub> addition, respectively), the rate constants were multiplied by ambient concentrations O<sub>2</sub> (21  
810 kPa) and CO<sub>2</sub> (41 Pa) as a pseudo-first order approximation for comparison to the other rate  
811 constants and to calculate their respective  $\Delta G^\ddagger$ . For the bottom figure, the left-hand column is  
812 modeled on the Radiolabel data and the right-hand column on the MIMS data so that  
813 comparisons between continuous and breakpoint temperature responses can be made. The values  
814 for intermediates were taken from Tcherkez (2013) for Panel A and Tcherkez (2016) for Panel B  
815 and assumed to remain constant with temperature.

816
